# Supplementary material
Source: PubMed Central journal article supplement (PMC3368634)
Supplement: cn900019r_si_001.pdf [file cn900019r_si_001.pdf]

*Supplemental Information.*

Effects of peptides derived from terminal modifications of the  
A $\beta$  central hydrophobic core on A $\beta$  fibrillization

Cyrus K. Bett,<sup>1</sup> Wilson K. Serem,<sup>1</sup> Krystal R. Fontenot,<sup>1</sup> Robert P. Hammer<sup>2</sup> and Jayne C. Garno<sup>1\*</sup>

<sup>1</sup>Department of Chemistry, Louisiana State University, Baton Rouge, LA 70803

<sup>2</sup>New England Peptide LLC, 65 Zub Lane, Gardner, MA 01440  
Phone: 978-630-0020 E-mail: [rphammer@gmail.com](mailto:rphammer@gmail.com)

\*corresponding author: Jayne C. Garno  
Phone: 225-578-8942  
E-mail: [jgarno@lsu.edu](mailto:jgarno@lsu.edu)

\*address  
Chemistry Department  
Louisiana State University  
232 Choppin Hall  
Baton Rouge, LA 70803

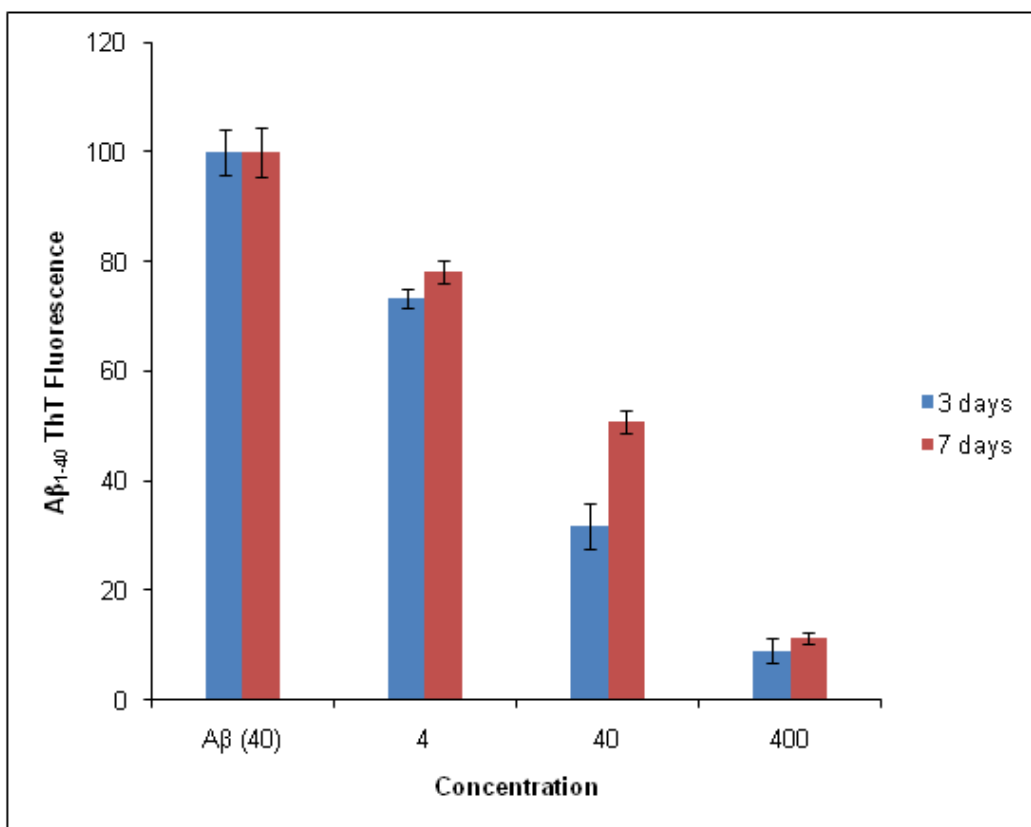

**Figure S1.** Concentration dependent study of the assembly of Aβ<sub>1-40</sub> in the presence of AAMP-14. Fluorescence (ThT) was set arbitrarily to 100 percent relative to Aβ<sub>1-40</sub>.

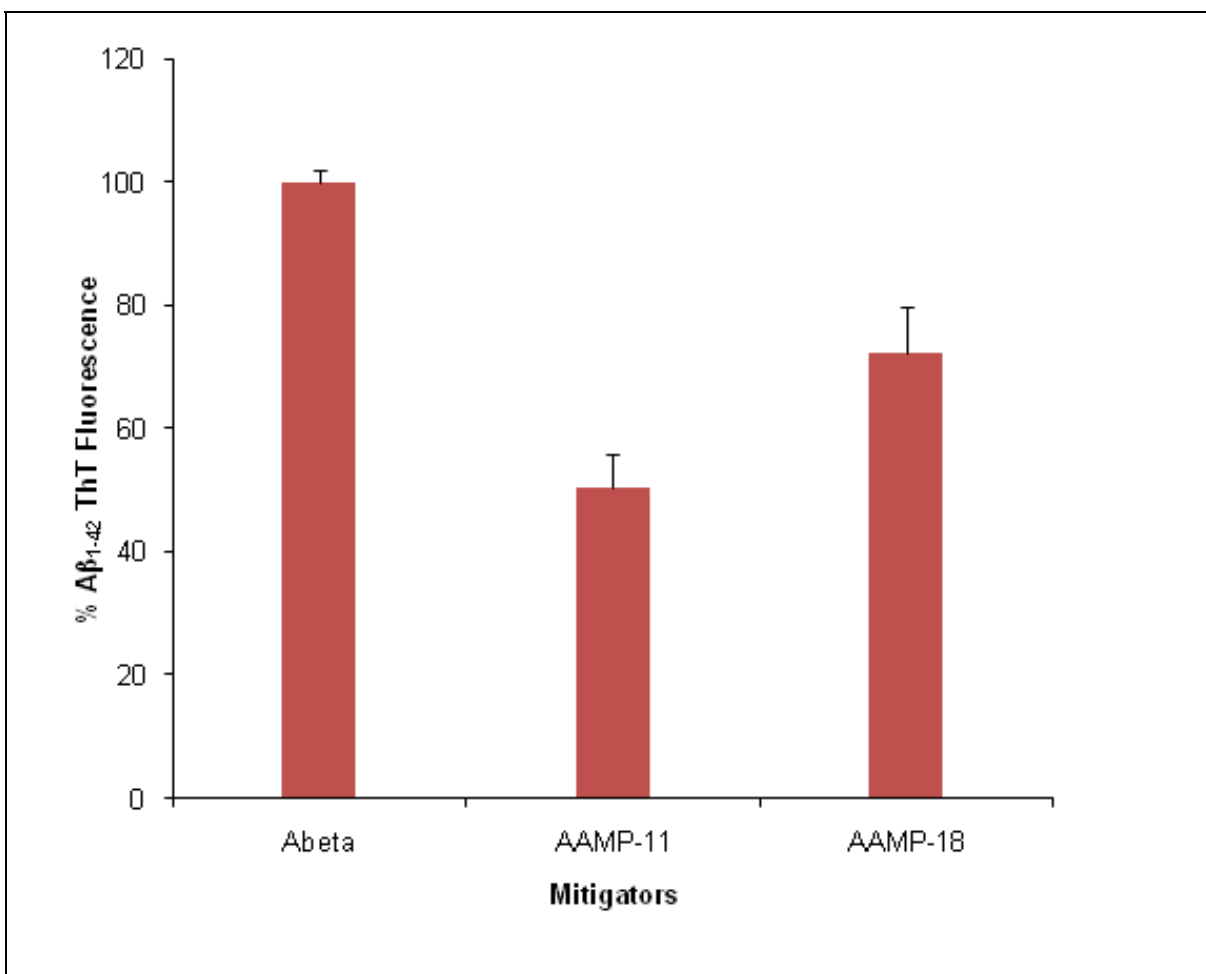

**Figure S2.** Assembly of Aβ<sub>1-42</sub> in the presence of ααAA-AAMPs. Time-dependent ThT fluorescence monitoring of Aβ<sub>1-42</sub> assembly in the presence or absence of the various AAMPs. Fluorescence (ThT) was set arbitrarily to 100 percent relative to Aβ<sub>1-42</sub>.

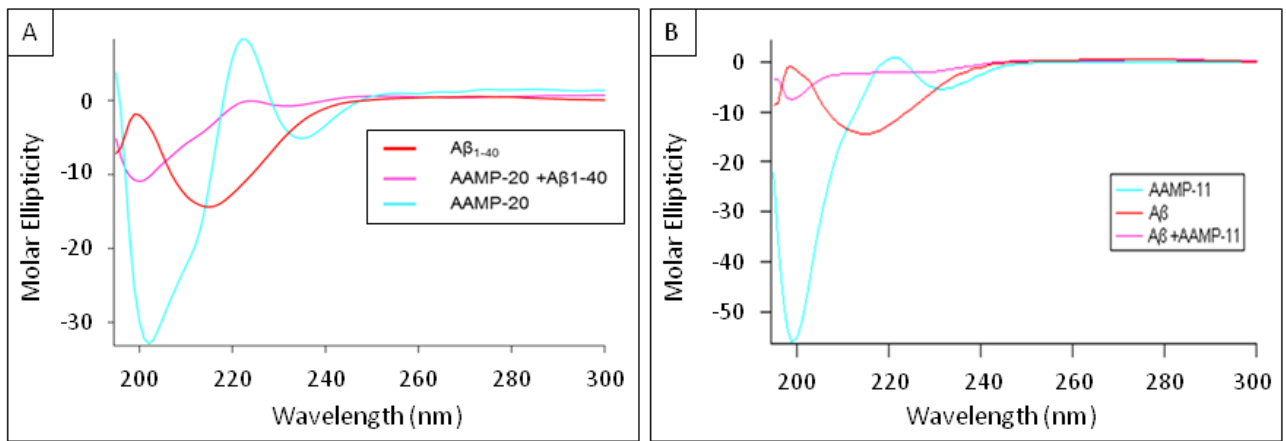

**Figure S3.** Example CD signatures obtained for A $\beta_{1-40}$  mitigation by [A] AAMP-20 and [B] AAMP-11 after aging samples for one week.

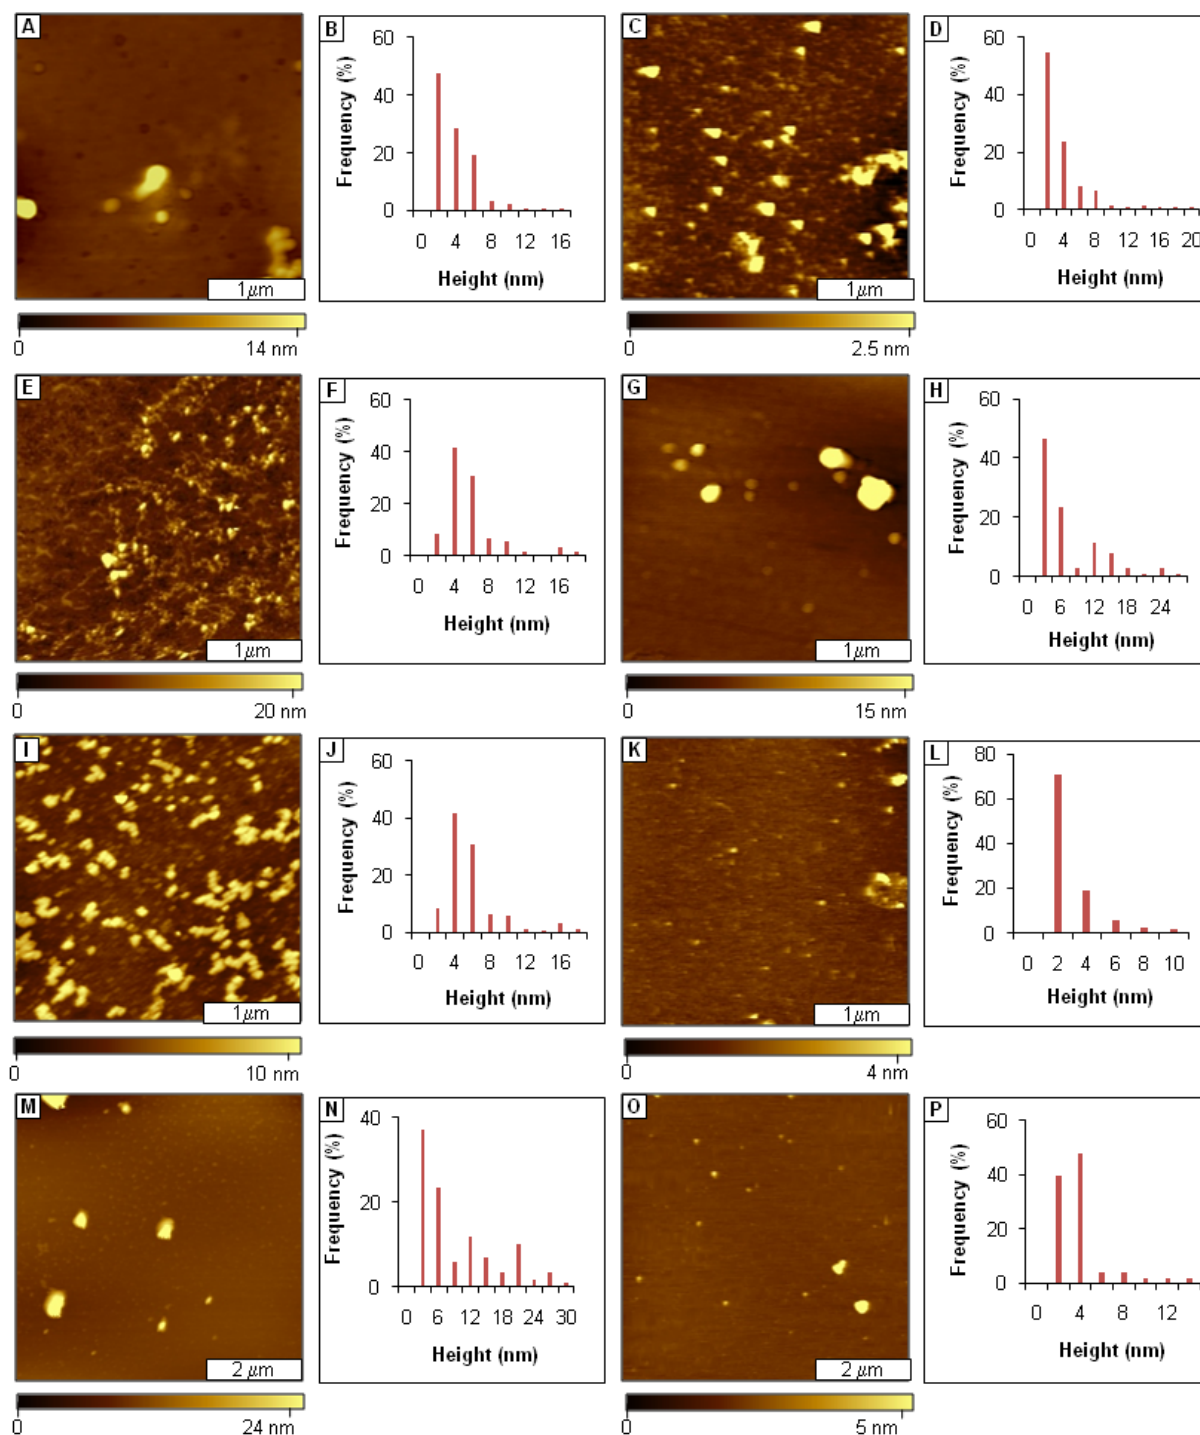

**Figure**

**re S4.** Spherical aggregates observed after one week of aging the various AAMPs alone. Topographic AFM views of spherical structures formed by: [A] AAMP-11 [B] corresponding height analysis for A; [C] AAMP-12 [D] height analysis for C; [E] AAMP-13; [F] height analysis for E; [G] AAMP-14; [H] height histogram for G; [I] AAMP-15; [J] height analysis for I; [K] AAMP-16; [L] height histogram for K; [M] AAMP-17; [N] height analysis for M; [O] AAMP-18; [P] height distribution for O; [Q] AAMP-19; [P] height analysis for Q.

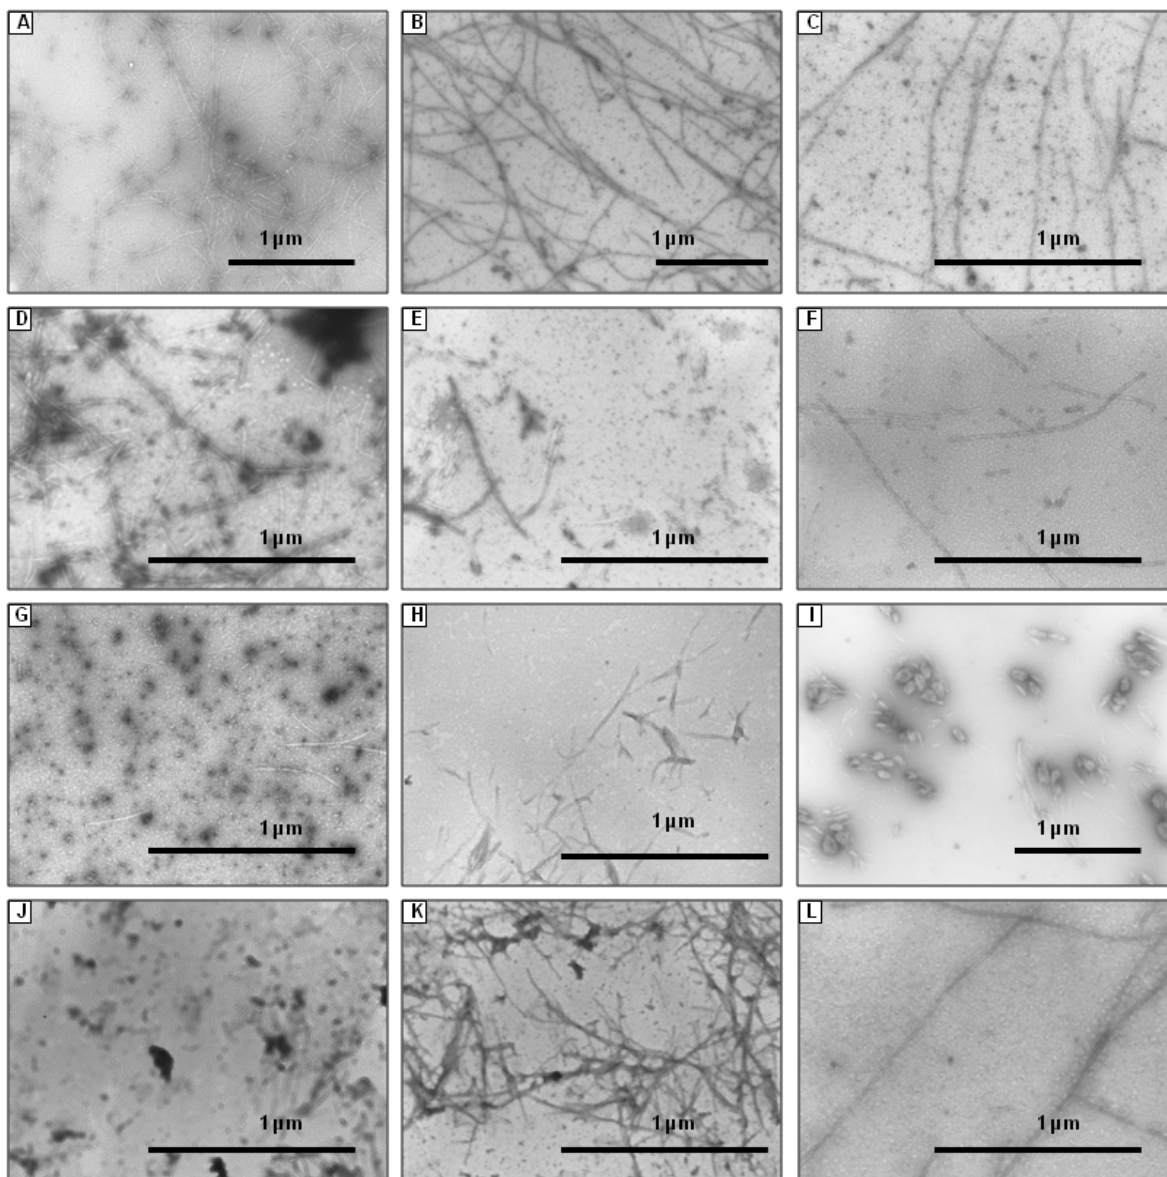

**Figure S5 (A).** Morphologies of various surface structures observed after one week of aging  $A\beta_{1-40}$  in the presence of various AAMPs with no  $\alpha\alpha$ AAs observed with TEM micrographs. [A] Fibrils formed by  $A\beta_{1-40}$  alone; [B] fibrils formed by  $A\beta_{1-40}$  alone, different view; [C] fibrils formed by  $A\beta_{1-40}$  alone, zoom in view of sample B; [D] fibrils formed from  $A\beta_{1-40}$  mitigation by AAMP-11; [E] spherical particles and fibrils formed from aging  $A\beta_{1-40}$  in the presence of AAMP-12; [F] spherical particles and isolated fibrils were observed from aging a mixture of  $A\beta_{1-40}$  and AAMP-13; [G] spherical particles formed from mitigation of  $A\beta_{1-40}$  aggregation by AAMP-14; [H] Mixture of spherical aggregates and short fibrils were observed from incubating  $A\beta_{1-40}$  in the presence of AAMP-15; [I] spherical particles formed from mitigation of  $A\beta_{1-40}$  aggregation by AAMP-16 [J] spherical aggregates observed from mitigation of  $A\beta_{1-40}$  aggregation by AAMP-17; [K] fibrils formed from  $A\beta_{1-40}$  mitigation by AAMP-18; [L] fibrils formed from  $A\beta_{1-40}$  mitigation by AAMP-19.

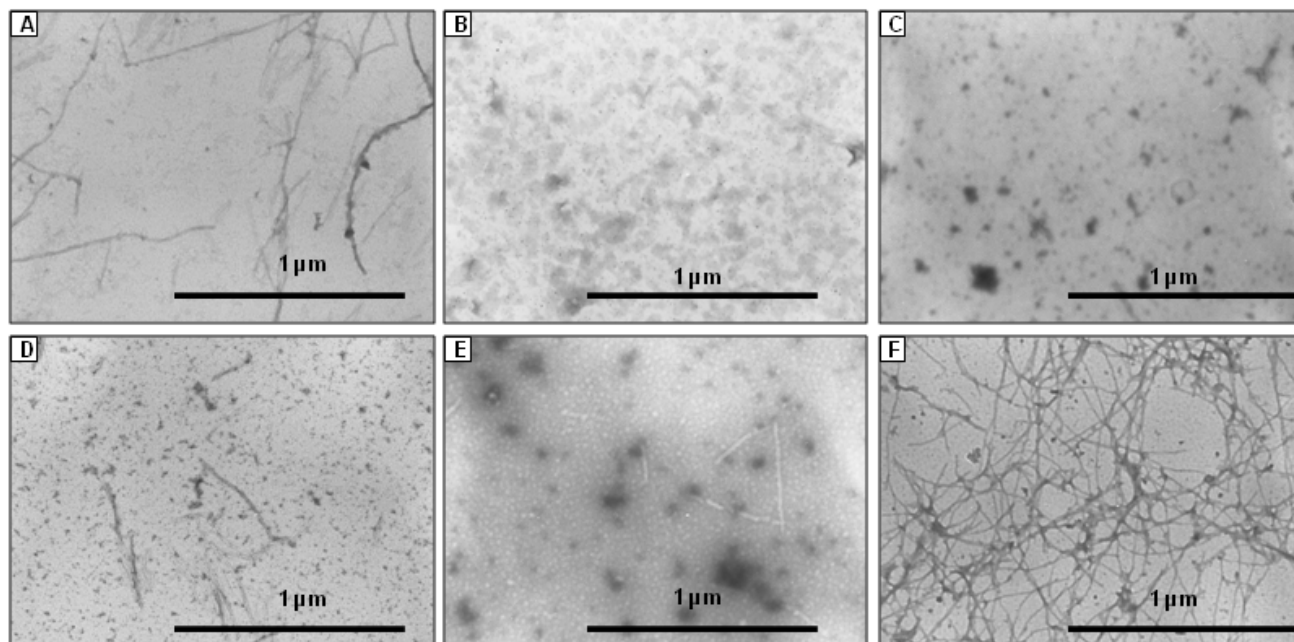

**Figure S5 (B).** Morphologies of various surface structures observed after one week of aging  $A\beta_{1-40}$  in the presence of various AAMPs with  $\alpha\alpha$ AAs, observed with TEM micrographs. [A] Fibrils formed from mitigation of  $A\beta_{1-40}$  by AAMP-20; [B] spherical particles formed from aging  $A\beta_{1-40}$  in the presence of AAMP-21; [C] spherical particles were observed from aging a mixture of  $A\beta_{1-40}$  and AAMP-22; [D] spherical particles and isolated fibrils formed from mitigation of  $A\beta_{1-40}$  aggregation by AAMP-23; [E] mixture of spherical aggregates and short fibrils were observed from incubating  $A\beta_{1-40}$  in the presence of AAMP-24; [F] fibrils formed from mitigation of  $A\beta_{1-40}$  by AAMP-25
